# Supplementary material for: Comparison of fluid balance and hemodynamic and metabolic effects of sodium lactate versus sodium bicarbonate versus 0.9% NaCl in porcine endotoxic shock: a randomized, open-label, controlled study
Source: Springer Nature journal article supplement (doi:10.1186/s13054-017-1694-1), 2017-05-19

$\frac{SL}{SB+G5\%} / \frac{NC+G5\%}{}$  from T30 to T300  
(2.5 mL/kg/15min NaCl 0.9% if MAP  $\leq$  65 mmHg)

NaCl 0.9% 25mL/kg

LPS (5  $\gamma$ /kg/min)

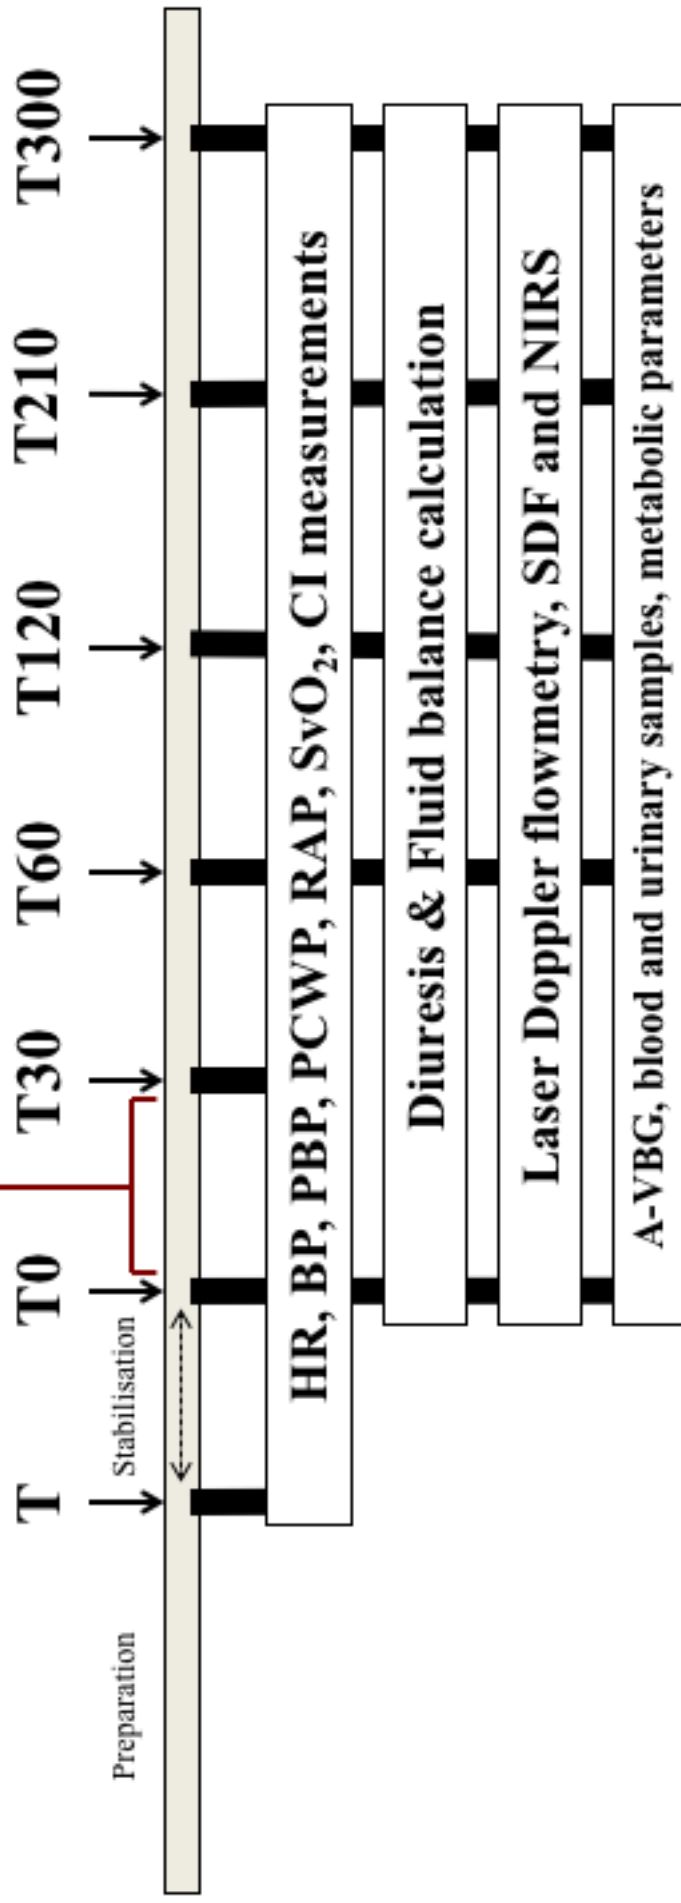

Supplement: MOESM2 [file 12300618]
