# Supplementary material for: Comparison of fluid balance and hemodynamic and metabolic effects of sodium lactate versus sodium bicarbonate versus 0.9% NaCl in porcine endotoxic shock: a randomized, open-label, controlled study
Source: Springer Nature journal article supplement (doi:10.1186/s13054-017-1694-1), 2017-05-19

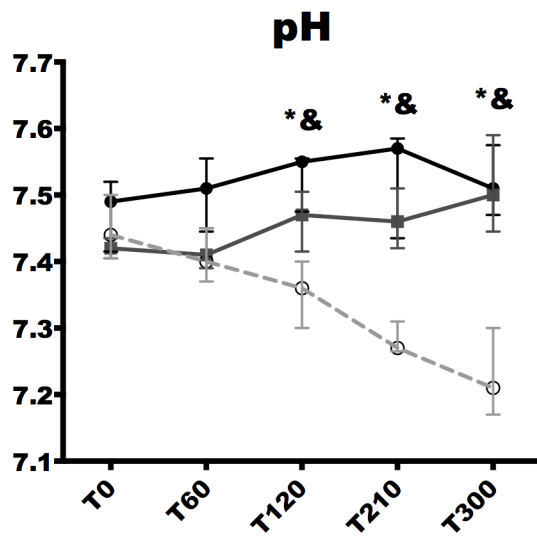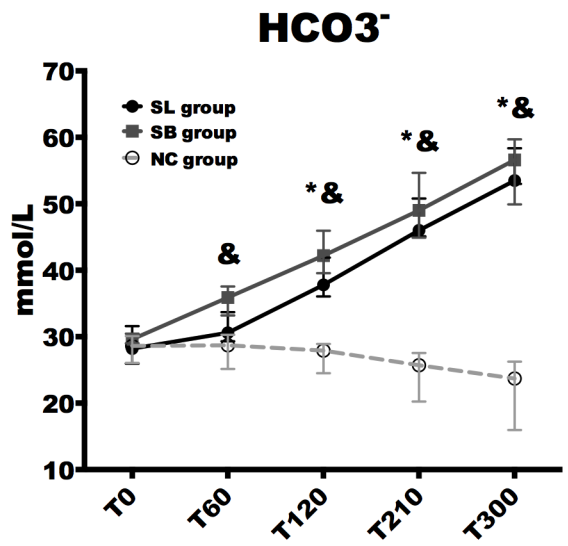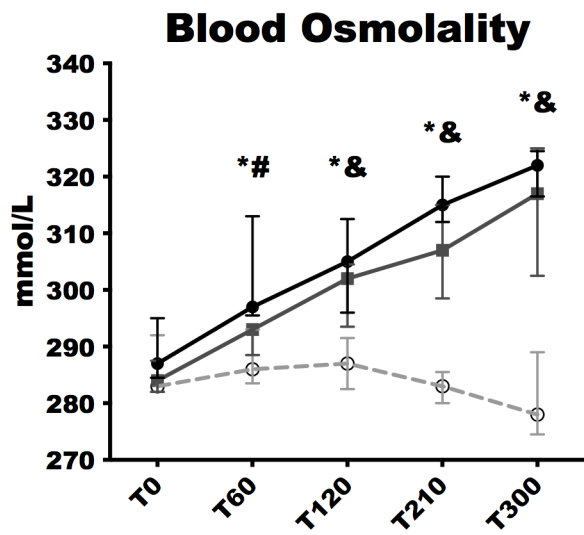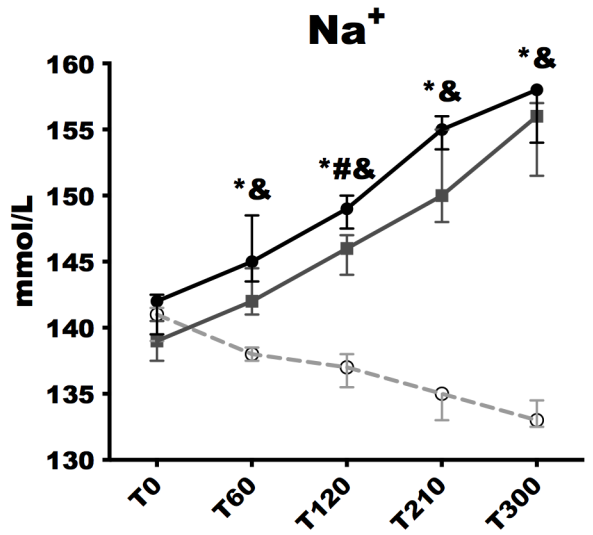

Supplement: MOESM5 [file 12300618]
