# Supplementary material for: Comparison of fluid balance and hemodynamic and metabolic effects of sodium lactate versus sodium bicarbonate versus 0.9% NaCl in porcine endotoxic shock: a randomized, open-label, controlled study
Source: Springer Nature journal article supplement (doi:10.1186/s13054-017-1694-1), 2017-05-19
Supplement: MOESM6 [file 12300618]

|                                        |      |                   |                   | <b>p</b>          |        |        |      |
|----------------------------------------|------|-------------------|-------------------|-------------------|--------|--------|------|
|                                        |      |                   |                   | NC vs.            | NC vs. | SB vs. |      |
|                                        |      | NC Group          | SB Group          | SL Group          | SB     | SL     | SL   |
| <b>BLOOD</b>                           |      |                   |                   |                   |        |        |      |
| pH                                     | T0   | 7.44 [7.4-7.5]    | 7.42 [7.4-7.3]    | 7.49 [7.41-7.52]  | ns     | ns     | ns   |
|                                        | T210 | 7.27 [7.26-7.41]  | 7.46 [7.42-7.51]  | 7.57 [7.43-7.58]  | 0.008  | 0.008  | ns   |
|                                        | T300 | 7.21 [7.17-7.3]   | 7.5 [7.44-7.59]   | 7.51 [7.47-7.57]  | 0.008  | 0.008  | ns   |
| HCO <sub>3</sub> <sup>-</sup> (mmol/l) | T0   | 28.6 [26-30]      | 29.6 [29-30.5]    | 28.2 [26-31.6]    | ns     | ns     | ns   |
|                                        | T210 | 25.7 [20.2-27.5]  | 49 [45-54.6]      | 46 [45-50.8]      | 0.008  | 0.008  | ns   |
|                                        | T300 | 23.7 [16-26.2]    | 56.6 [50-59.7]    | 53.5 [53-58.3]    | 0.008  | 0.008  | ns   |
| PaCO <sub>2</sub> (mmHg)               | T0   | 40.8 [35.2-47.9]  | 46.3 [43.4-48.8]  | 37.3 [33.3-47]    | ns     | ns     | ns   |
|                                        | T210 | 56.1 [43.5-63.5]  | 67.10 [62.7-77.2] | 49.4 [46.3-62.5]  | 0.05   | ns     | 0.03 |
|                                        | T300 | 56.1 [38.7-71]    | 70 [58.9-75.5]    | 64.7 [56.4-74.7]  | ns     | ns     | ns   |
| Na <sup>+</sup> (mmol/l)               | T0   | 141 [139-141.5]   | 139 [137.5-140.5] | 142 [139.5-142.5] | ns     | ns     | ns   |
|                                        | T210 | 135 [133-135]     | 150 [148-155]     | 149 [147.5-150]   | 0.008  | 0.008  | ns   |
|                                        | T300 | 133 [132.5-134.5] | 156 [151.5-157]   | 155 [154-158]     | 0.008  | 0.008  | ns   |
| K <sup>+</sup> (mmol/l)                | T0   | 3 [3-4]           | 3.9 [3.8-4]       | 3.8 [3.5-4.1]     | ns     | ns     | ns   |
|                                        | T300 | 4 [3-4.5]         | 3,6 [3.4-4.5]     | 3,1 [2.9-3.6]     | ns     | ns     | 0.07 |
| Cl <sup>-</sup> (mmol/l)               | T0   | 104 [100.5-105.5] | 101 [100-102.5]   | 103 [100-106.5]   | ns     | ns     | ns   |
|                                        | T300 | 98 [95.5-104.5]   | 91 [90-91.5]      | 90 [89-94]        | 0.008  | 0.008  | ns   |
| Ca <sup>2+</sup> (mmol/l)              | T0   | 2.4 [2.3-2.5]     | 2.5 [2.4-2.6]     | 2.5 [2.1-2.6]     | ns     | ns     | ns   |
|                                        | T300 | 2.3 [2.1-2.3]     | 1.98 [1.9-2.1]    | 2.2 [2.1-2.3]     | 0.03   | ns     | 0.04 |
| Mg <sup>2+</sup> (mmol/l)              | T0   | 17 [16.5-19]      | 17 [16.5-18]      | 16 [14.5-18.5]    | ns     | ns     | ns   |
|                                        | T300 | 19 [17.5-22]      | 18 [16.5-20]      | 18 [13.5-18.5]    | ns     | ns     | ns   |
| SID (mEq/l)                            | T0   | 58.7 [57-64.6]    | 61 [60.2-61.7]    | 57.6 [56.2-64.8]  | ns     | ns     | ns   |
|                                        | T210 | 55.4 [51.1-60.3]  | 79.2 [74.8-81]    | 72.3 [70.6-80.9]  | 0.008  | 0.008  | ns   |
|                                        | T300 | 56 [50-62]        | 83.8 [79.2-85]    | 81.1 [77.7-85.9]  | 0.008  | 0.008  | ns   |
| Total protein (g/l)                    | T0   | 50 [48-56.5]      | 55 [53.5-59.5]    | 50 [48-55]        | ns     | ns     | 0.07 |
|                                        | T210 | 42 [35-47.5]      | 40 [40-44.5]      | 41 [41-46.5]      | ns     | ns     | ns   |
|                                        | T300 | 43 [31.5-48.5]    | 41 [37.5-44.5]    | 43 [41.5-44]      | ns     | ns     | ns   |
| Osmolality (mosm/kg)                   | T0   | 283 [282-292]     | 284 [282-287]     | 287 [284-295]     | ns     | ns     | ns   |
|                                        | T210 | 283 [280-285]     | 307 [298-315]     | 315 [312-320]     | 0.008  | 0.008  | ns   |
|                                        | T300 | 278 [274-289]     | 317 [302-325]     | 322 [316-324]     | 0.008  | 0.008  | ns   |
| <b>URINE</b>                           |      |                   |                   |                   |        |        |      |
| Natriuresis (mmol)                     | T0   | 15.2 [9.8-24.8]   | 15.7 [11.2-28.1]  | 5.3 [1.7-29.6]    | ns     | ns     | ns   |
|                                        | T210 | 4.2 [1-6.4]       | 5 [3.7-14.3]      | 39.2 [18.5-43.7]  | ns     | 0.008  | 0.01 |
|                                        | T300 | 0.3 [0.1-8.3]     | 4.5 [0.2-17.9]    | 24.7 [19.9-46.3]  | ns     | 0.008  | 0.01 |
| Na/K                                   | T0   | 4.8 [3-6.3]       | 9.5 [7.6-21.3]    | 4.5 [3.5-8.7]     | 0.008  | ns     | 0.09 |
|                                        | T210 | 4 [3.2-7.8]       | 7.8 [4.6-8.8]     | 13.5 [9.7-17.4]   | ns     | 0.01   | 0.05 |
|                                        | T300 | 4.8 [3.4-6.7]     | 6.2 [3.2-11.1]    | 16.3 [9.9-18.8]   | ns     | 0.01   | 0.03 |
| Chloruresis (mmol)                     | T0   | 19.5 [12-26.3]    | 16.6 [11.4-25.2]  | 5.5 [0.8-28.3]    | ns     | ns     | ns   |
|                                        | T210 | 5 [1.6-8.6]       | 3.8 [1.9-10.1]    | 15.7 [5.1-17.5]   | ns     | 0.09   | 0.09 |
|                                        | T300 | 0.5 [0.2-9.9]     | 2.4 [0.09-4.7]    | 7.6 [3-11.3]      | ns     | 0.15   | 0.09 |
| Osmolality (mosm/kg)                   | T0   | 408 [345-543]     | 389 [324-519]     | 362 [179-649]     | ns     | ns     | ns   |
|                                        | T300 | 369 [354-424]     | 335 [331-376]     | 350 [334-387]     | ns     | ns     | ns   |
